# Supplementary material for: Molecular detection of flaviviruses and alphaviruses in mosquitoes (Diptera: Culicidae) from coastal ecosystems in the Colombian Caribbean
Source: PubMed Central journal article supplement (PMC5066328; doi:10.1590/0074-02760160096), 2016-10-03
Supplement: 0074-0276-mioc-0074-02760160096-suppl01.pdf [file 0074-0276-mioc-0074-02760160096-suppl01.pdf]

TABLE

Primers and reverse-transcription-polymerase chain reaction (RT-PCR) (generic/nested) conditions for arboviral detection in target groups

| Arboviruses group | Primers                                                                 | Gene target | Conditions for RT-PCR                                                                            | Reference |
|-------------------|-------------------------------------------------------------------------|-------------|--------------------------------------------------------------------------------------------------|-----------|
| Alphavirus        | Alpha1+ GAYGCITAYYTIGAYATGGTIGAIGG<br>Alpha1- KYTCYTCIGTRTGYTTIGTICCIGG | nSP4        | 1 cycle - 45 min/48°C<br>40 cycles: 30 sec/94°C, 1 min/52°C, 30 sec/68°C<br>1 cycle - 5 min/68°C | 58        |
|                   | Alpha2+ GIAAYTGAAAYGTIACICARATG<br>Alpha 2- GCRAAIARIGCIGCIGCYTYIGGICC  |             | 1 cycle - 2 min/94°C<br>40 cycles: 30 sec/94°C, 1 min/52°C, 15 sec/72°C<br>1 cycle - 5 min/72°C  |           |
| Flavivirus        | Flavi1+ GAYYTIGGITGYGGIIGIGGIRGITGG<br>Flavi1- TCCCAICCGICIRTRTCRTCIGC  | NS5         | 1 cycle - 45 min/38°C<br>40 cycles: 30 sec/94°C, 1 min/47°C, 75 sec/68°C<br>1 cycle - 5 min/68°C | 57        |
|                   | Flavi2+ YGYRTIYAYAWCAYSATGGG<br>Flavi2- CCARTGITCYKYRTTIAIRAAICC        |             | 1 cycle - 2 min/94°C<br>40 cycles: 30 sec/94°C, 1 min/47°C, 15 sec/72°C<br>1 cycle - 5 min/72°C  |           |
